# Supplementary material
Source: Springer Nature journal article supplement (https://www.springermedizin.de/resource/supplementary/12911_2011_560_MOESM1_ESM.pdf/9525964)
Supplement: MOESM1 [file 9525964]

# BWA software process

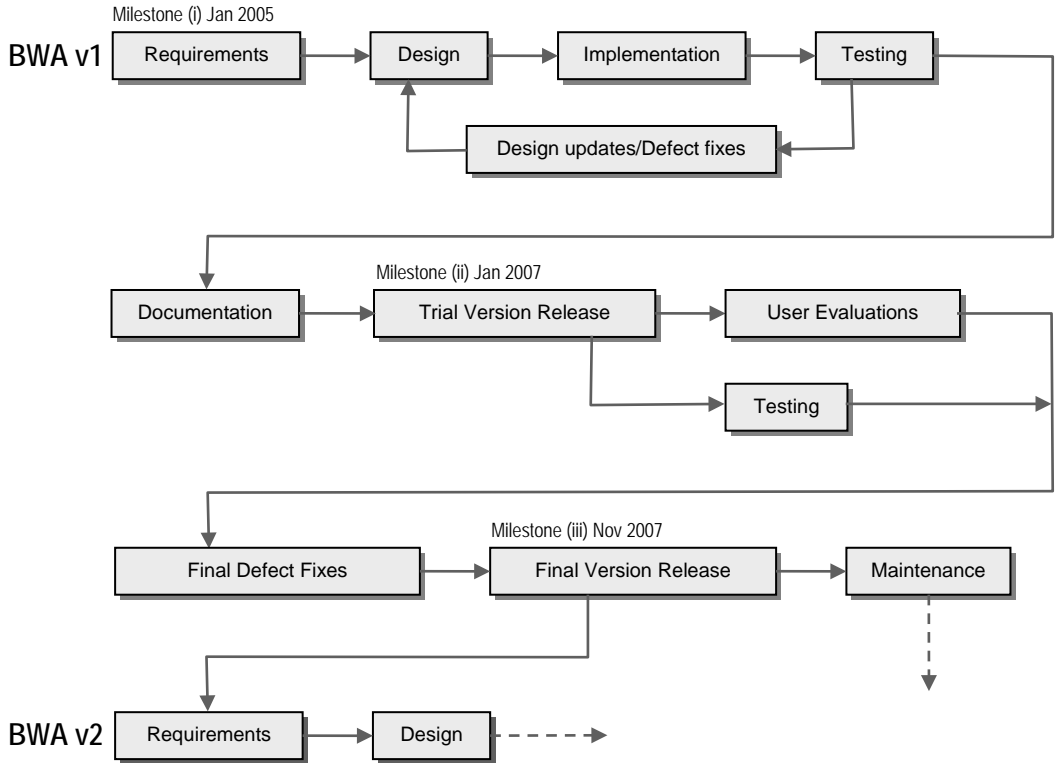

## Key clinical software development issues

Software reliability

Web security

Clinical data protection

User feedback
